# Supplementary material for: Maternal–Neonatal Outcomes of Obstetric Deliveries Performed in Negative Pressure Isolation Rooms during the COVID-19 Omicron Variant Pandemic in Taiwan: A Retrospective Cohort Study of a Single Institution
Source: MDPI journal article supplement (doi:10.3390/jcm11185441), 2022-09-16
Supplement: s1 [file s1]

**Table S1: Detailed information on maternal medical diseases in the study population**

| Maternal medical diseases                    | Delivery room (n = 21) | Isolated negative pressure room (n = 2) |
|----------------------------------------------|------------------------|-----------------------------------------|
| Type II diabetes mellitus                    | 1                      | 1                                       |
| Type I diabetes mellitus                     | 1                      | 0                                       |
| Hyperthyroidism                              | 3                      | 1                                       |
| Hypothyroidism                               | 3                      | 0                                       |
| Chronic hypertension                         | 2                      | 0                                       |
| Aklyosis spondylitis                         | 1                      | 0                                       |
| Asthma                                       | 1                      | 0                                       |
| Atiphospholipid syndrome                     | 2                      | 0                                       |
| Masthenia gravis                             | 1                      | 0                                       |
| Pophyria                                     | 1                      | 0                                       |
| Glucose-6-phosphate dehydrogenase deficiency | 1                      | 0                                       |
| Systemic lupus erythematosus                 | 2                      | 0                                       |
| IgA nephropathy                              | 1                      | 0                                       |
| Chronic hepatitis B                          | 2                      | 0                                       |

**Table S2. Maternal surgical outcomes of pairing each case with the same indication of cesarean section.**

| <i>Maternal Outcome Paired with Indications of Cesarean Deliveries—Previous uterine surgery</i>    |                      |                                      |         |
|----------------------------------------------------------------------------------------------------|----------------------|--------------------------------------|---------|
|                                                                                                    | Delivery room, n =   | Isolated negative pressure room, n = | p-value |
| Blood loss <sup>†</sup> (ml)                                                                       | 19<br>600 (300–1800) | 9<br>400 (200–800)                   | 0.042*  |
| Postpartum hemorrhage <sup>°</sup> (%)                                                             | 3 (15.8%)            | 0 (0.00%)                            | 0.530   |
| Operative time <sup>†</sup> (min)                                                                  | 91 (49–126)          | 93 (64–127)                          | 0.980   |
| <i>Maternal Outcome Paired with Indications of Cesarean Deliveries—Malpresentation</i>             |                      |                                      |         |
|                                                                                                    | Delivery room, n =   | Isolated negative pressure room, n = | p-value |
| Blood loss <sup>†</sup> (ml)                                                                       | 7<br>400 (300–800)   | 2<br>450 (400–500)                   | 0.648   |
| Postpartum hemorrhage (%)                                                                          | 0                    | 0                                    | -       |
| Operative time <sup>†</sup> (min)                                                                  | 94 (63–103)          | 82.5 (75–90)                         | 0.462   |
| <i>Maternal Outcome Paired with Indications of Cesarean Deliveries—Cephalopelvic disproportion</i> |                      |                                      |         |
|                                                                                                    | Delivery room, n =   | Isolated negative pressure room, n = | p-value |
| Blood loss <sup>†</sup> (ml)                                                                       | 1<br>500             | 1<br>300                             | -       |
| Postpartum hemorrhage (%)                                                                          | 0                    | 0                                    | -       |
| Operative time <sup>†</sup> (min)                                                                  | 84                   | 73                                   | -       |
| <i>Maternal Outcome Paired with Indications of Cesarean Deliveries—Dysfunctional labor</i>         |                      |                                      |         |
|                                                                                                    | Delivery room, n =   | Isolated negative pressure room, n = | p-value |
| Blood loss <sup>†</sup> (ml)                                                                       | 16<br>400 (300–900)  | 3<br>500 (400–1000)                  | 0.302   |
| Postpartum hemorrhage <sup>°</sup> (%)                                                             | 0                    | 1 (33.3%)                            | 0.176   |
| Operative time <sup>†</sup> (min)                                                                  | 77 (55–118)          | 84 (76–92)                           | 0.283   |

*Maternal Outcome Paired with Indications of Cesarean Deliveries—**Severe preeclampsia***

|                                      | Delivery room, n = 3 | Isolated negative pressure<br>room, n = 1 | <i>p</i> -value |
|--------------------------------------|----------------------|-------------------------------------------|-----------------|
| Blood loss <sup>†</sup> (ml)         | 400 (400–600)        | 200                                       | -               |
| Postpartum<br>hemorrhage (%)         | 0                    | 0                                         | -               |
| Operative time <sup>†</sup><br>(min) | 81 (39–92)           | 103                                       | -               |

*Maternal Outcome Paired with Indications of Cesarean Deliveries—**Non-reassuring fetal heart rate tracing***

|                                           | Delivery room, n = 5 | isolated negative pressure<br>room, n = 2 | <i>p</i> -value |
|-------------------------------------------|----------------------|-------------------------------------------|-----------------|
| Blood loss <sup>†</sup> (ml)              | 650 (500–1200)       | 900 (700–1100)                            | 0.481           |
| Postpartum<br>hemorrhage <sup>°</sup> (%) | 2 (40.0%)            | 1 (50.0%)                                 | 1.000           |
| Operative time <sup>†</sup><br>(min)      | 63 (61–90)           | 93.5 (86–101)                             | 0.121           |

<sup>†</sup> Mann–Whitney U-test; <sup>°</sup> Fisher’s exact test; \* two-sided *p*-value <0.05

**Figure S1. Detailed clinical information on newborns with neonatal respiratory distress.**

| No. | Maternal COVID-19 PCR test status | Gestational age (weeks) at birth | Delivery methods | Downes' score | Free flow oxygen use | Further respiratory support | Final diagnosis        |
|-----|-----------------------------------|----------------------------------|------------------|---------------|----------------------|-----------------------------|------------------------|
| 1   | Positive                          | 38 5/7                           | Cesarean section | 3             | yes                  | NC, flow 1L/min             | TTN                    |
| 2   | Positive                          | 36 6/7                           | Cesarean section | 4             | yes                  | NIMV, FiO2: 40%             | Congenital pneumonia   |
| 3   | Positive                          | 40 0/7                           | Vaginal delivery | 3             | yes                  | No                          | TTN                    |
| 4   | Positive                          | 37 5/7                           | Cesarean section | 4             | yes                  | NCPAP, FiO2:20%             | TTN                    |
| 5   | Positive                          | 34 3/7                           | Vaginal delivery | 5             | yes                  | NIMV, FiO2:20%              | TTN                    |
| 6   | Positive                          | 38 4/7                           | Vaginal delivery | 2             | yes                  | No                          | TTN                    |
| 7   | Positive                          | 36 0/7                           | Vaginal delivery | 2             | yes                  | Np                          | TTN                    |
| 8   | Positive                          | 35 6/7                           | Cesarean section | 3             | yes                  | NC, flow 1L/min             | TTN                    |
| 9   | Positive                          | 34 5/7                           | Vaginal delivery | 2             | yes                  | No                          | TTN                    |
| 10  | Positive                          | 39 6/7                           | Cesarean section | 3             | yes                  | No                          | TTN                    |
| 11  | Positive                          | 35 3/7                           | Cesarean section | 4             | yes                  | NIMV, FiO2:20%              | TTN                    |
| 12  | Positive                          | 39 4/7                           | Vaginal delivery | 2             | yes                  | No                          | TTN                    |
| 13  | Positive                          | 39 6/7                           | Vaginal delivery | 4             | yes                  | NC, flow 1L/min             | MAS                    |
| 14  | Positive                          | 39 0/7                           | Vaginal delivery | 4             | yes                  | NIMV, FiO2:30%              | TTN                    |
| 15  | Positive                          | 38 2/7                           | Cesarean section | 3             | yes                  | NC, flow 1L/min             | TTN                    |
| 16  | Positive                          | 39 6/7                           | Vaginal delivery | 4             | yes                  | No                          | MAS                    |
| 17  | Positive                          | 36 4/7                           | Vaginal delivery | 3             | yes                  | NC, flow 1L/min             | TTN                    |
| 18  | Positive                          | 38 5/7                           | Cesarean section | 4             | yes                  | NCPAP, FiO2:20%             | MAS                    |
| 19  | Negative                          | 36 1/7                           | Vaginal delivery | 4             | yes                  | NIMV, FiO2: 20%             | TTN                    |
| 20  | Negative                          | 35 1/7                           | Vaginal delivery | 2             | yes                  | No                          | Stage I RDS            |
| 21  | Negative                          | 38 1/7                           | Vaginal delivery | 5             | yes                  | IMV, FiO2:35%               | TTN                    |
| 22  | Negative                          | 34 3/7                           | Cesarean section | 4             | yes                  | NCPAP, FiO2:20%             | TTN                    |
| 23  | Negative                          | 35 3/7                           | Cesarean section | 4             | yes                  | NIMV, FiO2:20%              | TTN                    |
| 24  | Negative                          | 38 0/7                           | Cesarean section | 4             | yes                  | NCPAP, FiO2:20%             | TTN                    |
| 25  | Negative                          | 37 0/7                           | Cesarean section | 4             | yes                  | NCPAP, FiO2:20%             | TTN                    |
| 26  | Negative                          | 35 0/7                           | Cesarean section | 4             | yes                  | NIMV, FiO2:20%              | TTN                    |
| 27  | Negative                          | 36 3/7                           | Vaginal delivery | 3             | yes                  | NCPAP, FiO2:20%             | TTN                    |
| 28  | Negative                          | 39 6/7                           | Vaginal delivery | 4             | yes                  | NCPAP, FiO2:20%             | TTN                    |
| 29  | Negative                          | 38 2/7                           | Cesarean section | 3             | yes                  | NCPAP, FiO2:20%             | TTN                    |
| 30  | Negative                          | 36 6/7                           | Vaginal delivery | 4             | yes                  | NIMV, FiO2:25%              | TTN                    |
| 31  | Negative                          | 35                               | Vaginal delivery | 4             | yes                  | IMV, FiO2:40%               | Pulmonary hypertension |
| 32  | Negative                          | 37                               | Cesarean section | 4             | yes                  | NIMV, FiO2:25%              | TTN                    |
| 33  | Negative                          | 37 4/7                           | Cesarean section | 3             | yes                  | No                          | TTN                    |
| 34  | Negative                          | 38                               | Cesarean section | 4             | yes                  | NCPAP, FiO2:20%             | TTN                    |
| 35  | Negative                          | 39 1/7                           | Vaginal delivery | 4             | yes                  | NCPAP, FiO2:20%             | TTN                    |
| 36  | Negative                          | 38 2/7                           | Vaginal delivery | 3             | yes                  | No                          | TTN                    |

IMV, invasive mechanical ventilation; MAS, meconium aspiration syndrome; NC, nasal cannula; NCPAP, nasal continuous positive airway pressure; NIMV, non-invasive mechanical ventilation; RDS, respiratory distress syndrome; TTN, transient tachypnea of the newborn
